# Supplementary material
Source: Atypon-hosted journal article supplement (doi:10.1287/msom.2025.0391)
Supplement: msom.2025.0391.sm1.pdf [file msom.2025.0391.sm1.pdf]

# Capital Bikeshare Cleaned Data README

## Scope

This README documents the cleaned datasets produced by the notebook `clean_code.ipynb`. It does not describe raw inputs, scraping infrastructure, or other project artifacts beyond the cleaned outputs.

## Coverage

- Geography: Capital Bikeshare service area (DC, Arlington, Alexandria, Montgomery County, Fairfax, Prince George's County, Falls Church)
- Main time window for station-level and free-bike feeds: 2019-04-01 through 2022-09-30
- Trip data window: starts from 2019-04-01; `ended_at` values extend into early October 2022 for trips that began near the end of September

## Cleaned Data Products

All cleaned products are stored in `Data/Clean`.

## File Naming Convention

For Station Information, Station Status, Free Bike Status, and Trips, each subfolder contains multiple files, with one file per month.

- CSV subfolders contain monthly `.csv` files.
- Parquet subfolders contain monthly `.parquet` files.
- File names follow a `YYYY-MM-<dataset_name>.<ext>` pattern.

Example: - `Station Information - csv` contains monthly files named from `2019-04-station_information.csv` through `2022-09-station_information.csv`. - `Station Information - parquet` uses the same monthly naming pattern with `.parquet` extension.

The same month-by-month structure is used for Station Status, Free Bike Status, and Trips, with dataset-specific suffixes.

1. Station Information
2. Location: `Data/Clean/Station Information`
3. Files: monthly CSV files and monthly Parquet files
4. File coverage: monthly files (2019-04 through 2022-09), one file per month in each subfolder
5. Unit of observation: station by scrape minute
6. Primary identifiers: `station_id`, `short_name`, `scrape_time`

7. Description: cleaned station metadata over time (name, coordinates, capacity, region, kiosk/key dispenser indicators), with station ID and naming inconsistencies harmonized
8. Station Status
9. Location: Data/Clean/Station Status
10. Files: monthly CSV files and monthly Parquet files
11. File coverage: monthly files (2019-04 through 2022-09), one file per month in each subfolder
12. Unit of observation: station by scrape minute
13. Primary identifiers: station\_id, scrape\_time
14. Description: cleaned station availability/status counts (bikes, docks, e-bikes, disabled counts, operational flags), aligned to cleaned station identifiers
15. Free Bike Status
16. Location: Data/Clean/Free Bike Status
17. Files: monthly CSV files and monthly Parquet files
18. File coverage: monthly files, one file per month in each subfolder (coverage begins in 2020-06)
19. Unit of observation: bike\_id by scrape minute
20. Primary identifiers: bike\_id, scrape\_time
21. Description: cleaned free-floating bike records (location and reservation status)
22. Note: free-bike observations begin in mid-2020 in this dataset
23. Trips
24. Location: Data/Clean/Trips
25. Files: monthly CSV files and monthly Parquet files
26. File coverage: monthly files (2019-04 through 2022-09), one file per month in each subfolder
27. Unit of observation: trip
28. Description: cleaned monthly trip records with harmonized schema across historical format changes
29. System Regions
30. Location: Data/Clean
31. Files: system\_regions.csv and system\_regions.parquet
32. Unit of observation: region\_id
33. Primary identifier: region\_id
34. Description: cleaned lookup table from region\_id to region name, restricted to regions used in cleaned station information
35. Gap Files
36. Location: Data/Clean
37. Files: Station Information Gaps.csv and Station Status Gaps.csv
38. Unit of observation: contiguous scrape-time gap window
39. Description: summaries of missing scrape intervals in the station-level feeds, including the interval start/end and number of stations impacted
40. DC Ward Boundaries (GeoJSON)
41. Location: Data/Clean
42. Files: Wards\_from\_2022.geojson
43. Unit of observation: ward polygon feature

44. Description: GeoJSON shapefile defining Washington, DC ward boundaries (from 2022 onward) for mapping and spatial joins

## Key Variables by Dataset

Below are the key analytic fields expected after cleaning. Some optional fields appear only in subsets of months, consistent with source feed changes.

1. Station Information
2. station\_id, short\_name, name
3. lat, lon
4. region\_id
5. capacity
6. has\_kiosk, has\_key\_dispenser
7. last\_updated, ttl, scrape\_time
8. same\_as\_previous, same\_as\_previous\_excl\_last\_updated
9. optional station\_services\_\* fields in periods where valet data exists
10. Station Status
11. station\_id
12. num\_docks\_available, num\_bikes\_available, num\_ebikes\_available
13. num\_docks\_disabled, num\_bikes\_disabled
14. is\_installed, is\_returning, is\_renting
15. has\_available\_keys
16. last\_reported, last\_updated, ttl, scrape\_time
17. same\_as\_previous, same\_as\_previous\_excl\_last\_updated
18. optional valet\_\* fields in periods where valet data exists
19. Free Bike Status
20. bike\_id
21. lat, lon
22. is\_reserved
23. last\_updated, ttl, scrape\_time
24. same\_as\_previous, same\_as\_previous\_excl\_last\_updated
25. Trips
26. started\_at, ended\_at
27. start\_station\_id, end\_station\_id (these correspond to station short\_name values)
28. member\_casual (coded to numeric)
29. rideable\_type (numeric coding where present)
30. ride\_id and bike\_number may appear depending on source month/schema
31. System Regions
32. region\_id
33. name
34. Gap Files
35. start\_gap
36. stop\_gap
37. num\_stations\_impacted
38. stations\_impacted

39. DC Ward Boundaries (GeoJSON)
40. geometry (polygon/multipolygon)
41. ward identifier and ward name attributes (as provided in the source GeoJSON)

## Join Guidance

1. Station status to station information
2. Recommended join keys: station\_id plus aligned time logic using scrape\_time
3. Trips to station information
4. start\_station\_id and end\_station\_id map to short\_name in Station Information (not station\_id)
5. Station information to system regions
6. Join on region\_id

## Cleaning Outcomes Included in These Files

The cleaned outputs include: - removal of known invalid/private/test records - harmonization of known station identifier changes - correction of many known station name typos/inconsistencies - targeted imputation/fixes for missing or zeroed coordinates and missing region values where recoverable - type standardization for dates, numeric counts, and boolean flags - duplicate flag construction using same\_as\_previous and same\_as\_previous\_excl\_last\_updated - filtering of invalid trip durations and exact duplicate trips

## Important Caveats

- Some fields are structurally missing in early months because upstream APIs/files changed over time.
- A subset of station records still has capacity equal to zero; these were retained.
- Free bike IDs are privacy-preserving and rotate frequently, so they should not be treated as persistent bike identifiers over long horizons.
